# Supplementary material
Source: PubMed Central journal article supplement (PMC6902159)
Supplement: jamainternmed-180-245-s001.pdf [file jamainternmed-180-245-s001.pdf]

## Supplementary Online Content

Lutsey PL, Norby FL, Ensrud KE, et al. Association of anticoagulant therapy with risk of fracture among patients with atrial fibrillation. *JAMA Intern Med*. Published online November 25, 2019. doi:10.1001/jamainternmed.2019.5679

**eFigure 1.** Exclusions Flowchart

**eFigure 2.** Adjusted Hazard Ratios (95% Confidence Intervals) of Incident Fracture, According to Initial Oral Anticoagulant Therapy for the Treatment of Patients With Atrial Fibrillation, Stratified by Subgroups of Interest

**eTable 1.** ICD-9-CM Codes Used to Define Comorbidities

**eTable 2.** Sensitivity Analyses Evaluating the Association Between DOACs vs Warfarin on Risk of Hip and Inpatient Fractures Among Patients With Atrial Fibrillation

**eTable 3.** Adjusted Hazard Ratios (95% Confidence Intervals) for Incident Fracture Comparing New Users of Oral Anticoagulants Among Patients With Nonvalvular AF

**eTable 4.** Adjusted Hazard Ratios (95% Confidence Intervals) for Incident Fracture Comparing New Users of Oral Anticoagulants by Dose of Direct Oral Anticoagulant to Warfarin, Among Patients With Nonvalvular AF

This supplementary material has been provided by the authors to give readers additional information about their work.

**eFigure 1. Exclusions Flowchart**

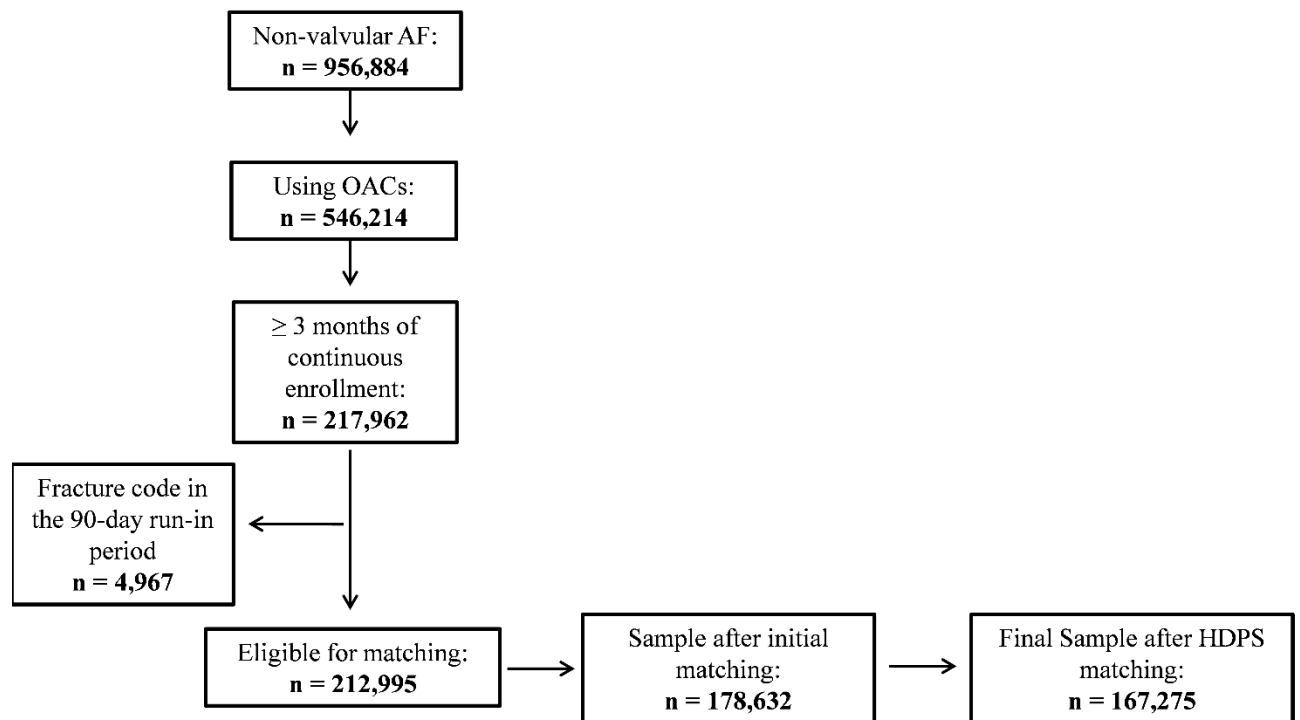

**eFigure 2.** Adjusted Hazard Ratios (95% Confidence Intervals) of Incident Fracture, According to Initial Oral Anticoagulant Therapy for the Treatment of Patients With Atrial Fibrillation, Stratified by Subgroups of Interest

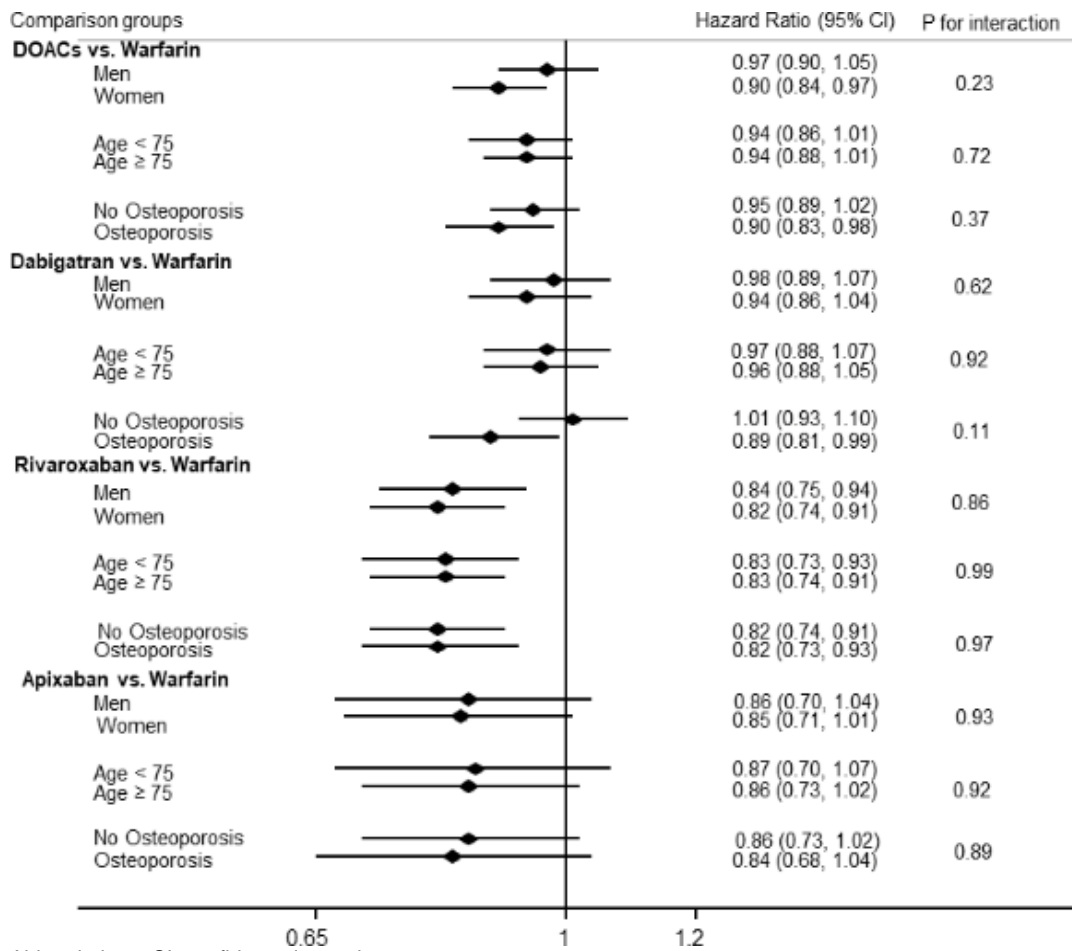

Abbreviations: CI, confidence interval.

<sup>a</sup>OAC users matched, and models adjusted for age, sex, CHA<sub>2</sub>DS<sub>2</sub>-VASc score, high-dimensional propensity score, and frailty. MarketScan 2010-2015.

**eTable 1. ICD-9-CM Codes Used to Define Comorbidities**

| Condition                 | ICD-9-CM codes                                                                                                                                                                                                                                                                                                                                                                                                                                                                                                                                                                                               |
|---------------------------|--------------------------------------------------------------------------------------------------------------------------------------------------------------------------------------------------------------------------------------------------------------------------------------------------------------------------------------------------------------------------------------------------------------------------------------------------------------------------------------------------------------------------------------------------------------------------------------------------------------|
| Alcoholism                | 265.2, 291.1, 291.2, 291.3, 291.5, 291.6, 291.7, 291.8, 291.9, 303.0, 303.9, 305.0, 357.5, 425.5, 535.3, 571.0, 571.1, 571.2, 571.3, 980, V11.3                                                                                                                                                                                                                                                                                                                                                                                                                                                              |
| Chronic pulmonary disease | 416.8, 416.9, 506.4, 508.1, 508.8, 490-505                                                                                                                                                                                                                                                                                                                                                                                                                                                                                                                                                                   |
| Dementia                  | 290.x, 294.1, 331.2                                                                                                                                                                                                                                                                                                                                                                                                                                                                                                                                                                                          |
| Depression                | 296.2, 296.3, 296.5, 300.4, 309, 311                                                                                                                                                                                                                                                                                                                                                                                                                                                                                                                                                                         |
| Diabetes                  | 250                                                                                                                                                                                                                                                                                                                                                                                                                                                                                                                                                                                                          |
| Frailty                   | 260.xx, 261.xx, 262.xx, 263.xx, 272, 290.x-299.x, 300.0, 310.x, 311.x, 332.x, 342.xx, 344.xx, 348.xx, 349.82, 386, 432.xx, 433.01, 433.11, 433.21, 433.31, 433.91, 434.01, 434.11, 434.91, 436.xx, 438.2-438.5, 438.85, 458.x, 596.5, 599.6, 681.1, 700, 703.x, 707.0, 707.1, 707.2, 707.8, 707.9, 710.xx-712.xx, 714.xx, 715.xx, 716.5, 716.6, 716.8, 716.9, 718.xx, 719.0, 719.1, 719.4, 719.5, 719.7, 719.9, 725.xx, 728.2, 780.4, 780.7, 781.2, 781.3, 781.4, 783.2, 783.7, 785.5, 788.3, 797, 799.4, 799.3, 852.xx-854xx, 958.4, 998.0, E880-E888, E929.3, V46.3, V15.88 V571, V573, V578, V579, V572.1 |
| Malignancy                | 140-172, 174-195, 200-208, 238.6                                                                                                                                                                                                                                                                                                                                                                                                                                                                                                                                                                             |
| Metastatic cancer         | 196-199                                                                                                                                                                                                                                                                                                                                                                                                                                                                                                                                                                                                      |
| Gastrointestinal bleeding | 455.2, 455.5, 455.8, 456.0, 456.20, 530.7, 530.82, 531.0, 531.2, 531.4, 531.6, 532.0, 532.2, 532.4, 532.6, 533.0, 533.2, 533.4, 533.6, 534.0, 534.2, 534.4, 534.6, 535.01, 535.11, 535.21, 535.31, 535.41, 535.51, 535.61, 537.83, 562.02, 562.03, 562.12, 562.13, 568.81, 569.3, 569.85, 578.0, 578.1, 578.9                                                                                                                                                                                                                                                                                                |
| Heart failure             | 398.91, 402.01, 402.11, 402.91, 404.01, 404.03, 404.11, 404.13, 404.91, 404.93, 425.4, 425.9, 428                                                                                                                                                                                                                                                                                                                                                                                                                                                                                                            |
| Hemorrhagic stroke        | 430, 431, 432                                                                                                                                                                                                                                                                                                                                                                                                                                                                                                                                                                                                |
| Hematological disorders   | 280-286, 287.1, 287.3, 287.4, 287.5                                                                                                                                                                                                                                                                                                                                                                                                                                                                                                                                                                          |
| Hypertension              | 401, 402, 403, 404, 405                                                                                                                                                                                                                                                                                                                                                                                                                                                                                                                                                                                      |
| Ischemic stroke           | 433, 434, 435, 436, 437, 438                                                                                                                                                                                                                                                                                                                                                                                                                                                                                                                                                                                 |
| Kidney disease            | 403.01, 403.11, 403.91, 404.02, 404.03, 404.12, 404.13, 404.92, 404.93, 582, 583.0, 583.1, 583.2, 583.3, 583.4, 583.5, 583.6, 583.7, 585, 586, 588.0, V42.0, V45.1, V56                                                                                                                                                                                                                                                                                                                                                                                                                                      |
| Liver disease             | 070.22, 070.23, 070.32, 070.33, 070.44, 070.54, 070.6, 070.9, 456.0, 456.1, 456.2, 570, 571, 572.2, 572.3, 572.4, 572.5, 572.6, 572.7, 572.8, 573.3, 573.4, 573.8, 573.9, V42.7                                                                                                                                                                                                                                                                                                                                                                                                                              |
| Myocardial infarction     | 410, 412                                                                                                                                                                                                                                                                                                                                                                                                                                                                                                                                                                                                     |
| Osteoporosis              | 715, 733                                                                                                                                                                                                                                                                                                                                                                                                                                                                                                                                                                                                     |
| Other bleeding            | 423.0, 459.0, 568.81, 593.81, 599.7, 623.8, 626.6, 719.1, 784.7, 784.8, 786.3                                                                                                                                                                                                                                                                                                                                                                                                                                                                                                                                |
| Peripheral artery disease | 440.0, 440.2, 440.9, 443.9                                                                                                                                                                                                                                                                                                                                                                                                                                                                                                                                                                                   |

**eTable 2.** Sensitivity Analyses Evaluating the Association Between DOACs vs Warfarin on Risk of Hip and Inpatient Fractures Among Patients With Atrial Fibrillation<sup>a</sup>

| <b>Dabigatran vs. Warfarin</b>                |                                                          | <b>Hazard Ratio (95% CI)<sup>a</sup></b> | <b>p-value</b> |
|-----------------------------------------------|----------------------------------------------------------|------------------------------------------|----------------|
| Hip fractures, 1 <sup>st</sup> position       |                                                          |                                          |                |
|                                               | Original model from Table 2                              | 0.98 (0.80, 1.20)                        | 0.86           |
|                                               | Model + adjust for prevalent fracture <sup>b</sup>       | 0.98 (0.80, 1.21)                        | 0.87           |
|                                               | Model + adjust for osteoporosis                          | 0.98 (0.80, 1.21)                        | 0.88           |
|                                               | Excluding those with prevalent fracture (original model) | 0.98 (0.79, 1.22)                        | 0.88           |
|                                               | Requiring 6 month run-in (original model)                | 0.97 (0.78, 1.21)                        | 0.79           |
| Inpatient fractures, 1 <sup>st</sup> position |                                                          |                                          |                |
|                                               | Original model from Table 2                              | 0.88 (0.78, 1.00)                        | 0.06           |
|                                               | Model + adjust for prevalent fracture <sup>b</sup>       | 0.88 (0.78, 1.00)                        | 0.06           |
|                                               | Model + adjust for osteoporosis                          | 0.88 (0.78, 1.00)                        | 0.05           |
|                                               | Excluding those with prevalent fracture (original model) | 0.88 (0.77, 1.00)                        | 0.05           |
|                                               | Requiring 6 month run-in (original model)                | 0.89 (0.78, 1.02)                        | 0.09           |
| <b>Rivaroxaban vs. Warfarin</b>               |                                                          |                                          |                |
| Hip fractures, 1 <sup>st</sup> position       |                                                          |                                          |                |
|                                               | Original model from Table 2                              | 0.89 (0.71, 1.12)                        | 0.33           |
|                                               | Model + adjust for prevalent fracture <sup>b</sup>       | 0.89 (0.71, 1.13)                        | 0.34           |
|                                               | Model + adjust for osteoporosis                          | 0.89 (0.71, 1.12)                        | 0.33           |
|                                               | Excluding those with prevalent fracture (original model) | 0.95 (0.75, 1.21)                        | 0.66           |
|                                               | Requiring 6 month run-in (original model)                | 0.81 (0.62, 1.06)                        | 0.12           |
| Inpatient fractures, 1 <sup>st</sup> position |                                                          |                                          |                |
|                                               | Original model from Table 2                              | 0.80 (0.69, 0.93)                        | 0.003          |
|                                               | Model + adjust for prevalent fracture <sup>b</sup>       | 0.80 (0.69, 0.93)                        | 0.003          |
|                                               | Model + adjust for osteoporosis                          | 0.80 (0.69, 0.93)                        | 0.003          |
|                                               | Excluding those with prevalent fracture (original model) | 0.82 (0.70, 0.95)                        | 0.008          |
|                                               | Requiring 6 month run-in (original model)                | 0.79 (0.67, 0.94)                        | 0.008          |
| <b>Apixaban vs. Warfarin</b>                  |                                                          |                                          |                |
| Hip fractures, 1 <sup>st</sup> position       |                                                          |                                          |                |
|                                               | Original model from Table 2                              | 0.67 (0.45, 0.98)                        | 0.04           |
|                                               | Model + adjust for prevalent fracture <sup>b</sup>       | 0.66 (0.45, 0.98)                        | 0.04           |
|                                               | Model + adjust for osteoporosis                          | 0.66 (0.45, 0.98)                        | 0.04           |
|                                               | Excluding those with prevalent fracture (original model) | 0.58 (0.38, 0.88)                        | 0.01           |
|                                               | Requiring 6 month run-in (original model)                | 0.65 (0.42, 1.02)                        | 0.06           |
| Inpatient fractures, 1 <sup>st</sup> position |                                                          |                                          |                |
|                                               | Original model from Table 2                              | 0.60 (0.47, 0.78)                        | <0.0001        |
|                                               | Model + adjust for prevalent fracture <sup>b</sup>       | 0.60 (0.46, 0.77)                        | <0.0001        |
|                                               | Model + adjust for osteoporosis                          | 0.60 (0.47, 0.78)                        | <0.0001        |
|                                               | Excluding those with prevalent fracture (original model) | 0.58 (0.44, 0.76)                        | <0.0001        |
|                                               | Requiring 6 month run-in (original model)                | 0.63 (0.47, 0.84)                        | 0.002          |
| <b>DOACs vs. Warfarin</b>                     |                                                          |                                          |                |
| Hip fractures, 1 <sup>st</sup> position       |                                                          |                                          |                |
|                                               | Original model from Table 2                              | 0.91 (0.78, 1.07)                        | 0.27           |
|                                               | Model + adjust for prevalent fracture <sup>b</sup>       | 0.91 (0.78, 1.07)                        | 0.27           |
|                                               | Model + adjust for osteoporosis                          | 0.92 (0.78, 1.07)                        | 0.28           |
|                                               | Excluding those with prevalent fracture (original model) | 0.90 (0.76, 1.07)                        | 0.23           |
|                                               | Requiring 6 month run-in (original model)                | 0.91 (0.76, 1.08)                        | 0.27           |
| Inpatient fractures, 1 <sup>st</sup> position |                                                          |                                          |                |
|                                               | Original model from Table 2                              | 0.87 (0.79-0.96)                         | 0.007          |
|                                               | Model + adjust for prevalent fracture <sup>b</sup>       | 0.87 (0.79-0.96)                         | 0.007          |
|                                               | Model + adjust for osteoporosis                          | 0.87 (0.79-0.96)                         | 0.007          |
|                                               | Excluding those with prevalent fracture (original model) | 0.87 (0.78-0.97)                         | 0.01           |

|                                                                                                                                                                                                                                                                                          |                                           |                  |      |
|------------------------------------------------------------------------------------------------------------------------------------------------------------------------------------------------------------------------------------------------------------------------------------------|-------------------------------------------|------------------|------|
|                                                                                                                                                                                                                                                                                          | Requiring 6 month run-in (original model) | 0.87 (0.78-0.97) | 0.01 |
| <sup>a</sup> Matched 1-1 on high-dimensional propensity score and adjusted for age, sex, CHA <sub>2</sub> DS <sub>2</sub> -VASc score, high-dimensional propensity score and frailty. MarketScan 2010-2015.<br><sup>b</sup> Claims indicating fracture prior to the 90 day run-in period |                                           |                  |      |

**eTable 3.** Adjusted Hazard Ratios (95% Confidence Intervals) for Incident Fracture Comparing New Users of Oral Anticoagulants Among Patients With Nonvalvular AF

| <b>DOACS vs. warfarin</b>                           | <b>Group</b>    | <b>Hazard Ratio (95% CI)<sup>a</sup></b> | <b>p-value for interaction</b> |
|-----------------------------------------------------|-----------------|------------------------------------------|--------------------------------|
| <b>Hip fractures, 1<sup>st</sup> position</b>       |                 |                                          |                                |
|                                                     | Men             | 0.97 (0.76, 1.25)                        | 0.53                           |
|                                                     | Women           | 0.88 (0.71, 1.10)                        |                                |
|                                                     | Age <75         | 0.88 (0.60, 1.31)                        | 0.67                           |
|                                                     | Age ≥ 75        | 0.94 (0.79, 1.12)                        |                                |
|                                                     | No Osteoporosis | 1.06 (0.86, 1.30)                        | 0.03                           |
|                                                     | Osteoporosis    | 0.74 (0.58, 0.96)                        |                                |
| <b>Inpatient fractures, 1<sup>st</sup> position</b> |                 |                                          |                                |
|                                                     | Men             | 0.97 (0.82, 1.13)                        | 0.12                           |
|                                                     | Women           | 0.81 (0.71, 0.93)                        |                                |
|                                                     | Age <75         | 0.79 (0.65, 0.97)                        | 0.10                           |
|                                                     | Age ≥ 75        | 0.92 (0.82, 1.03)                        |                                |
|                                                     | No Osteoporosis | 0.97 (0.85, 1.11)                        | 0.01                           |
|                                                     | Osteoporosis    | 0.75 (0.64, 0.88)                        |                                |
| <b>All fractures, 1<sup>st</sup> position</b>       |                 |                                          |                                |
|                                                     | Men             | 0.97 (0.90, 1.05)                        | 0.23                           |
|                                                     | Women           | 0.90 (0.84, 0.97)                        |                                |
|                                                     | Age <75         | 0.94 (0.86, 1.01)                        | 0.72                           |
|                                                     | Age ≥ 75        | 0.94 (0.88, 1.01)                        |                                |
|                                                     | No Osteoporosis | 0.95 (0.89, 1.02)                        | 0.37                           |
|                                                     | Osteoporosis    | 0.90 (0.83, 0.98)                        |                                |
| <b>Dabigatran vs. Warfarin</b>                      |                 |                                          |                                |
| <b>Hip fractures, 1<sup>st</sup> position</b>       |                 |                                          |                                |
|                                                     | Men             | 1.08 (0.79, 1.48)                        | 0.46                           |
|                                                     | Women           | 0.92 (0.70, 1.21)                        |                                |
|                                                     | Age <75         | 0.74 (0.45, 1.22)                        | 0.14                           |
|                                                     | Age ≥ 75        | 1.06 (0.85, 1.33)                        |                                |
|                                                     | No Osteoporosis | 1.16 (0.89, 1.50)                        | 0.06                           |
|                                                     | Osteoporosis    | 0.76 (0.54, 1.07)                        |                                |
| <b>Inpatient fractures, 1<sup>st</sup> position</b> |                 |                                          |                                |
|                                                     | Men             | 1.06 (0.87, 1.29)                        | 0.02                           |
|                                                     | Women           | 0.78 (0.66, 0.92)                        |                                |
|                                                     | Age <75         | 0.75 (0.59, 0.96)                        | 0.03                           |
|                                                     | Age ≥ 75        | 0.99 (0.83, 1.12)                        |                                |
|                                                     | No Osteoporosis | 1.00 (0.85, 1.20)                        | 0.02                           |
|                                                     | Osteoporosis    | 0.74 (0.61, 0.90)                        |                                |
| <b>All fractures, 1<sup>st</sup> position</b>       |                 |                                          |                                |
|                                                     | Men             | 0.98 (0.89, 1.07)                        | 0.62                           |
|                                                     | Women           | 0.94 (0.86, 1.04)                        |                                |
|                                                     | Age <75         | 0.97 (0.88, 1.07)                        | 0.92                           |
|                                                     | Age ≥ 75        | 0.96 (0.88, 1.05)                        |                                |
|                                                     | No Osteoporosis | 1.01 (0.93, 1.10)                        | 0.11                           |
|                                                     | Osteoporosis    | 0.89 (0.81, 0.99)                        |                                |
| <b>Rivaroxaban vs. Warfarin</b>                     |                 |                                          |                                |
| <b>Hip fractures, 1<sup>st</sup> position</b>       |                 |                                          |                                |
|                                                     | Men             | 0.98 (0.67, 1.44)                        | 0.52                           |
|                                                     | Women           | 0.85 (0.64, 1.13)                        |                                |
|                                                     | Age <75         | 0.98 (0.56, 1.71)                        | 0.93                           |
|                                                     | Age ≥ 75        | 0.88 (0.68, 1.13)                        |                                |
|                                                     | No Osteoporosis | 0.94 (0.69, 1.27)                        | 0.67                           |

|                                                                                                                                                                                                                                                                         |                 |                   |      |
|-------------------------------------------------------------------------------------------------------------------------------------------------------------------------------------------------------------------------------------------------------------------------|-----------------|-------------------|------|
|                                                                                                                                                                                                                                                                         | Osteoporosis    | 0.83 (0.58, 1.18) |      |
| Inpatient fractures, 1 <sup>st</sup> position                                                                                                                                                                                                                           |                 |                   |      |
|                                                                                                                                                                                                                                                                         | Men             | 0.94 (0.74, 1.20) | 0.13 |
|                                                                                                                                                                                                                                                                         | Women           | 0.74 (0.62, 0.89) |      |
|                                                                                                                                                                                                                                                                         | Age <75         | 0.91 (0.68, 1.24) | 0.54 |
|                                                                                                                                                                                                                                                                         | Age ≥ 75        | 0.78 (0.66, 0.92) |      |
|                                                                                                                                                                                                                                                                         | No Osteoporosis | 0.88 (0.72, 1.07) | 0.17 |
|                                                                                                                                                                                                                                                                         | Osteoporosis    | 0.72 (0.58, 0.89) |      |
| All fractures, 1 <sup>st</sup> position                                                                                                                                                                                                                                 |                 |                   |      |
|                                                                                                                                                                                                                                                                         | Men             | 0.84 (0.75, 0.94) | 0.86 |
|                                                                                                                                                                                                                                                                         | Women           | 0.82 (0.74, 0.91) |      |
|                                                                                                                                                                                                                                                                         | Age <75         | 0.83 (0.73, 0.93) | 0.99 |
|                                                                                                                                                                                                                                                                         | Age ≥ 75        | 0.83 (0.74, 0.91) |      |
|                                                                                                                                                                                                                                                                         | No Osteoporosis | 0.82 (0.74, 0.91) | 0.97 |
|                                                                                                                                                                                                                                                                         | Osteoporosis    | 0.82 (0.73, 0.93) |      |
| <b>Apixaban vs. warfarin</b>                                                                                                                                                                                                                                            |                 |                   |      |
| Hip fractures, 1 <sup>st</sup> position                                                                                                                                                                                                                                 |                 |                   |      |
|                                                                                                                                                                                                                                                                         | Men             | 0.57 (0.30, 1.05) | 0.50 |
|                                                                                                                                                                                                                                                                         | Women           | 0.74 (0.45, 1.21) |      |
|                                                                                                                                                                                                                                                                         | Age <75         | 1.06 (0.43, 2.62) | 0.34 |
|                                                                                                                                                                                                                                                                         | Age ≥ 75        | 0.61 (0.40, 0.94) |      |
|                                                                                                                                                                                                                                                                         | No Osteoporosis | 0.70 (0.41, 1.17) | 0.83 |
|                                                                                                                                                                                                                                                                         | Osteoporosis    | 0.65 (0.36, 1.15) |      |
| Inpatient fractures, 1 <sup>st</sup> position                                                                                                                                                                                                                           |                 |                   |      |
|                                                                                                                                                                                                                                                                         | Men             | 0.77 (0.52, 1.12) | 0.14 |
|                                                                                                                                                                                                                                                                         | Women           | 0.51 (0.36, 0.71) |      |
|                                                                                                                                                                                                                                                                         | Age <75         | 0.89 (0.54, 1.46) | 0.20 |
|                                                                                                                                                                                                                                                                         | Age ≥ 75        | 0.55 (0.41, 0.73) |      |
|                                                                                                                                                                                                                                                                         | No Osteoporosis | 0.58 (0.42, 0.81) | 0.69 |
|                                                                                                                                                                                                                                                                         | Osteoporosis    | 0.64 (0.42, 0.95) |      |
| All fractures, 1 <sup>st</sup> position                                                                                                                                                                                                                                 |                 |                   |      |
|                                                                                                                                                                                                                                                                         | Men             | 0.86 (0.70, 1.04) | 0.93 |
|                                                                                                                                                                                                                                                                         | Women           | 0.85 (0.71, 1.01) |      |
|                                                                                                                                                                                                                                                                         | Age <75         | 0.87 (0.70, 1.07) | 0.92 |
|                                                                                                                                                                                                                                                                         | Age ≥ 75        | 0.86 (0.73, 1.02) |      |
|                                                                                                                                                                                                                                                                         | No Osteoporosis | 0.86 (0.73, 1.02) | 0.89 |
|                                                                                                                                                                                                                                                                         | Osteoporosis    | 0.84 (0.68, 1.04) |      |
| <sup>a</sup> Adjusted for age, sex, CHA <sub>2</sub> DS <sub>2</sub> -VASc score, high-dimensional propensity score, and frailty where appropriate. MarketScan, 2010-2015.<br>Osteoporosis defined by ICD-9 codes and medications. Codes make up most of the diagnosis. |                 |                   |      |



**eTable 4.** Adjusted Hazard Ratios (95% Confidence Intervals) for Incident Fracture Comparing New Users of Oral Anticoagulants by Dose of Direct Oral Anticoagulant to Warfarin, Among Patients With Nonvalvular AF

|                                                 | <b>Warfarin</b> | <b>Dabigatran</b>        |                           |                          |
|-------------------------------------------------|-----------------|--------------------------|---------------------------|--------------------------|
|                                                 |                 | Reduced dose<br>(75 mg)  | Standard dose<br>(150 mg) |                          |
| Hip fractures, 1 <sup>st</sup> position         | 186             | 39                       | 143                       |                          |
| HR (95% CI)                                     | 1.00 (ref)      | 0.98 (0.69, 1.40)        | 0.98 (0.79, 1.22)         |                          |
| # Inpatient fractures, 1 <sup>st</sup> position | 510             | 80                       | 367                       |                          |
| HR (95% CI)                                     | 1.00 (ref)      | 0.87 (0.68, 1.10)        | 0.89 (0.77, 1.02)         |                          |
| # All fractures, 1 <sup>st</sup> position       | 1803            | 245                      | 1519                      |                          |
| HR (95% CI)                                     | 1.00 (ref)      | 1.01 (0.88, 1.16)        | 0.95 (0.89, 1.02)         |                          |
|                                                 | <b>Warfarin</b> | <b>Rivaroxaban</b>       |                           |                          |
|                                                 |                 | Reduced dose<br>(10mg)   | Reduced dose<br>(15 mg)   | Standard dose<br>(20 mg) |
| Hip fractures, 1 <sup>st</sup> position         | 170             | 14                       | 51                        | 63                       |
| HR (95% CI)                                     | 1.00 (ref)      | 1.05 (0.61, 1.82)        | 1.02 (0.74, 1.40)         | 0.78 (0.58, 1.05)        |
| # Inpatient fractures, 1 <sup>st</sup> position | 445             | 27                       | 110                       | 170                      |
| HR (95% CI)                                     | 1.00 (ref)      | 0.78 (0.53, 1.16)        | 0.90 (0.73, 1.12)         | 0.75 (0.63, 0.90)        |
| # All fractures, 1 <sup>st</sup> position       | 1493            | 114                      | 286                       | 724                      |
| HR (95% CI)                                     | 1.00 (ref)      | 1.05 (0.87, 1.27)        | 0.86 (0.76, 0.98)         | 0.78 (0.72, 0.86)        |
|                                                 | <b>Warfarin</b> | <b>Apixaban</b>          |                           |                          |
|                                                 | Any dose        | Reduced dose<br>(2.5 mg) | Standard dose<br>(5 mg)   |                          |
| Hip fractures, 1 <sup>st</sup> position         | 70              | 17                       | 24                        |                          |
| HR (95% CI)                                     | 1.00 (ref)      | 0.73 (0.42, 1.25)        | 0.63 (0.39, 1.01)         |                          |
| # Inpatient fractures, 1 <sup>st</sup> position | 174             | 36                       | 56                        |                          |
| HR (95% CI)                                     | 1.00 (ref)      | 0.69 (0.48, 0.99)        | 0.56 (0.41, 0.76)         |                          |
| # All fractures, 1 <sup>st</sup> position       | 521             | 120                      | 276                       |                          |
| HR (95% CI)                                     | 1.00 (ref)      | 1.02 (0.83, 1.26)        | 0.80 (0.69, 0.92)         |                          |

<sup>a</sup>Adjusted for age, sex, CHA<sub>2</sub>DS<sub>2</sub>-VASc score, high-dimensional propensity score, and frailty. MarketScan, 2010-2015.
